# Supplementary material for: Bactericidal Disruption of Magnesium Metallostasis in Mycobacterium tuberculosis Is Counteracted by Mutations in the Metal Ion Transporter CorA
Source: PubMed Central journal article supplement (PMC6747715; doi:10.1128/mbio.01405-19), 2019-07-09
Supplement: mBio.01405-19-s0001.pdf [file mBio.01405-19-s0001.pdf]

## 1 **Supplemental Methods**

2 **Bacterial growth conditions.** Wild-type Mtb strain H37Rv (ATCC 25618) was grown in  
3 replicating conditions consisting of Middlebrook 7H9 broth supplemented with 10% oleic  
4 acid, dextrose and catalase (OADC) (BD Difco, USA), 0.5% glycerol, and 0.2%  
5 tyloxapol (Sigma) and incubated in 5% CO<sub>2</sub>, 20% O<sub>2</sub> at 37 °C. BCG Pasteur IP1173P2  
6 was cultivated in Middlebrook 7H9 medium (4.7 g/L Middlebrook 7H9 Broth, Difco) and  
7 supplemented with 0.4% (v/v) glycerol, 0.05% (v/v) Tween 80 and 10% (v/v)  
8 Middlebrook OADC enrichment, (0.6% v/v oleic acid, 2 mg/mL dextrose, 5 mg/mL  
9 bovine serum albumin, 3 µg/mL catalase), or on solid medium 7H10 (19 g/L  
10 Middlebrook 7H10 Agar, Difco) adjusted to pH 6.6 and supplemented with 10%  
11 Middlebrook OADC enrichment and 0.5% glycerol. For non-replicating conditions,  
12 replicating Mtb cells were diluted in non-replicating medium composed of modified  
13 Sauton's base at a pH 5.0, butyrate as the carbon source, and 0.5 mM NaNO<sub>2</sub>. The  
14 cells were then incubated in 5% CO<sub>2</sub> and 1.0% O<sub>2</sub> at 37 °C. In the nutrient starvation  
15 (Loebel) model of non-replication (Loebel, R. O., Shorr, E. & Richardson, H. B. *J*  
16 *Bacteriol* **26**, 167-200, 1933), Mtb cells were incubated for 4 weeks in PBS-Tyl solution  
17 without CaCl<sub>2</sub> and MgCl<sub>2</sub> in 5% CO<sub>2</sub> and 20% O<sub>2</sub> at 37 °C ("starvation"). After a month  
18 of starvation, cells were exposed to compounds for 7 days, after which cell survival was  
19 assessed.

20 **MIC and CARA assays.** Minimum inhibitory concentration (MIC) values for Mtb cells  
21 were determined by serially diluting compounds in dimethylsulfoxide (DMSO) and  
22 dispensing into 96-well plate. Final DMSO concentrations did not exceed 1%. For the  
23 replicating MIC, bacterial suspensions were diluted to an OD<sub>580</sub> of 0.01 and added to

24 the plate containing the compound. For non-replicating cells, NR MIC was determined  
25 as described (Warrier, T., et. al., *ACS Infect Dis* **1**, 580-585, 2015) by resuspending  
26 cells from the NR plates and transferred to a second plate containing supplemented  
27 7H9 broth and incubated under replicating conditions for 10-12 days before recording  
28 the OD<sub>580</sub>. For *BCG* MIC, 96-well plates were incubated for 6 days at 37 °C and 5%  
29 CO<sub>2</sub> in plastic bags. Alamar Blue (Promega) with 5% v/v Tween80 was added to the  
30 *BCG* cells to determine cell viability; fluorescence was measured ( $\lambda_{ex}$  = 530 nm,  $\lambda_{em}$  =  
31 590 nm) after 16-24 hrs. IC<sub>50</sub> or IC<sub>90</sub> were calculated using the in-house analysis  
32 program, Speedlogic (Sanofi). CARA plates were prepared and assayed as described  
33 (Gold, B., et. al., *Antimicrob Agents Chemother* **59**, 6521-6538, 2015; Gold, B., *J Vis*  
34 *Exp.*, 118, 2016; doi: 10.3791/54690). Briefly, after 7 days of compound exposure, cells  
35 were resuspended and CARA plates containing agar with 4g/L charcoal were inoculated  
36 with 10  $\mu$ L from the culture plate. After incubating the plates for 7 days (replicating  
37 assay) or 12-14 days (NR assay), 50  $\mu$ l of resazurin solution was added to each well.

38 **Whole cell screens.** We conducted two whole-cell screens independently. 673,640  
39 chemical compounds from the Sanofi library were screened at 10  $\mu$ M against *M.*  
40 *smegmatis* under replicating conditions. In addition, 90,000 compounds from the Sanofi  
41 collection were screened at 10  $\mu$ M using *M. tuberculosis* strain mc<sup>2</sup>6220  
42 ( $\Delta panCD\Delta lysA$ ) (Larsen, M. H., et. al., *Vaccine* **27**, 4709-4717, 2009) under both  
43 replicating conditions and the non-replicating conditions of the 4-stress model (Gold, B.,  
44 et. al., *Antimicrob Agents Chemother* **59**, 6521-6538, 2015).

45 **Generation of resistant mutants.** Resistant *Mtb* mutants for 2178, 2504, and 2150  
46 were generated using 7H11 agar plates supplemented with 10% OADC and 0.5%

47 glycerol and made to contain 2X, 4X, 8X, or 10X the replicating MIC of the compound.  
48 These plates were inoculated with  $10^9$ ,  $10^8$ ,  $10^7$ , or  $10^6$  CFUs. After 2 months of  
49 incubation, colonies were detected only on the 2X and 4X plates. SAR1 resistant BCG  
50 was selected on 7H10 at 2.5X and 10X the MIC. Resistant colonies were confirmed on  
51 10X the SAR1 MIC. The genomes of seven independently isolated Mtb mutants were  
52 purified using the cetyltrimethylammonium bromide (CTAB, Sigma-Aldrich) extraction  
53 method (Amaro, A., et. al, *Lett Appl Microbiol* **47**, 8-11, 2008) followed by three phenol  
54 chloroform extractions to yield clean high quality DNA for whole genome sequencing.  
55 The three BCG genomes were isolated using Invitrogen Genomic DNA mini kit  
56 (Invitrogen, USA).

57 **MD simulations.** MD simulations of the wild type and the mutated A317S  
58 homopentamer were prepared, executed and analysed with Amber18 and  
59 AmberTools18 software packages (D.A. Case, I.Y. et. al., AMBER2018, University of  
60 California, San Francisco, 2018). CHARMM-GUI membrane builder (Lee, et. al., *J*  
61 *Chem Theory Comput* **12**, 405-413, 2016) was used for the embedding of the  
62 transmembrane part of CorA in the 1,2-dimyristoyl-sn-glycero-3-phosphocholine  
63 (DMPC) bilayer. Both systems were optimized with series of subsequent energy  
64 minimizations followed by low temperature short simulations, which gradually increased  
65 up to 300K simulations. The simulations were performed with the ff14SB and Lipid14  
66 force fields (Dickson, C.J., et. al., *J Chem Theory Comput* **10**, 865-879, 2014; Maier, J.  
67 A., et. al., *J Chem Theory Comput* **11**, 3696-3713, 2015) . Explicitly solvated TIP3P  
68 waters (Jorgensen, W. L., Chandrasekhar, J., Madura, JD., *The Journal of Chemical*  
69 *Physics* **79**, 926, 1983) in NPT ensemble, and 2fs integration steps were used for

70 generation of more than 400 ns production runs in total with snapshots saved every 20  
 71 ps. Simulations were carried out with all 10 magnesium ions bound to their known sites  
 72 in the intracellular part of the protein, and additional sodium ions were added for the  
 73 system total charge neutralization.

74 **ICP-MS.** Agilent MassHunter for ICP-MS software was used for data reduction and  
 75 processing. Instrument parameters are listed below. An independent reference  
 76 material was analyzed immediately after calibration to verify instrument accuracy. All  
 77 QA/QC samples met a priori acceptance criteria. All samples were diluted fifteen-fold in  
 78 2% (v/v) nitric acid to normalize acid content with the calibration standards. Final  
 79 graphical values were expressed as concentrations in the 30% nitric acid extract in  
 80 which ppm ( $\mu\text{g}/\text{mL}$ ) or ppb ( $\text{ng}/\text{mL}$ ) were converted to  $\mu\text{M}$ .

#### Agilent 7800 ICP-MS Instrument Settings

|                        | Hydrogen Mode | Helium Mode |
|------------------------|---------------|-------------|
| RF Power (Watts)       | 1600          | 1600        |
| Sample Depth (mm)      | 8             | 8           |
| Nebulizer Gas (L\min)  | 0.75          | 0.75        |
| Dilution Gas (L\min)   | 0.4           | 0.4         |
| OctP Bias (V)          | -20           | -20         |
| KED (V)                | 4             | 4           |
| Cell Gas Flow (ml\min) | 6             | 5           |

81

82 **Metal complexation using Infrared spectroscopy.** We attempted to isolate potential  
 83 metal complexes by adding a solution of 2178 or 2504 (50 mg, 1eq) in 20 mL  
 84 dichloromethane (DCM) and 3 mL of methanol to a solution of magnesium chloride  
 85 hexahydrate (27.5 mg, 1 eq) or cobalt (II) chloride hexahydrate (31.5 mg, 1 eq) in 1 mL  
 86 of methanol. The resulting solution was left open in a fume hood for 4-6 hours until a

87 suspension formed after about half the volume evaporated. The solid was filtered and  
88 vacuum dried. Characterization was performed using Infrared (IR) spectrometry and  
89 elemental analysis (EA). Compound and compound-metal complex spectra were  
90 generated in a Nexus FT-IR spectrometer (Thermo Fisher) using solid state samples  
91 prepared from cesium iodide chips for the far IR spectra or by Attenuated Total  
92 Reflection (ATR) for the medium IR spectra. Elemental analysis was carried out by  
93 introducing 1 mg of sample into a reaction tube maintained at 1000 °C using a Flash  
94 2000 system (Thermo Fisher). Combustion gases (CO<sub>2</sub>, H<sub>2</sub>O, N<sub>2</sub>O and SO<sub>2</sub>) were then  
95 separated and dosed by chromatography. Water content was determined by Karl-  
96 Fischer coulometric titration.

97

98

99

100
