# Supplementary material for: Bactericidal Disruption of Magnesium Metallostasis in Mycobacterium tuberculosis Is Counteracted by Mutations in the Metal Ion Transporter CorA
Source: PubMed Central journal article supplement (PMC6747715; doi:10.1128/mbio.01405-19), 2019-07-09
Supplement: mBio.01405-19-sf001.pdf [file mBio.01405-19-sf001.pdf]

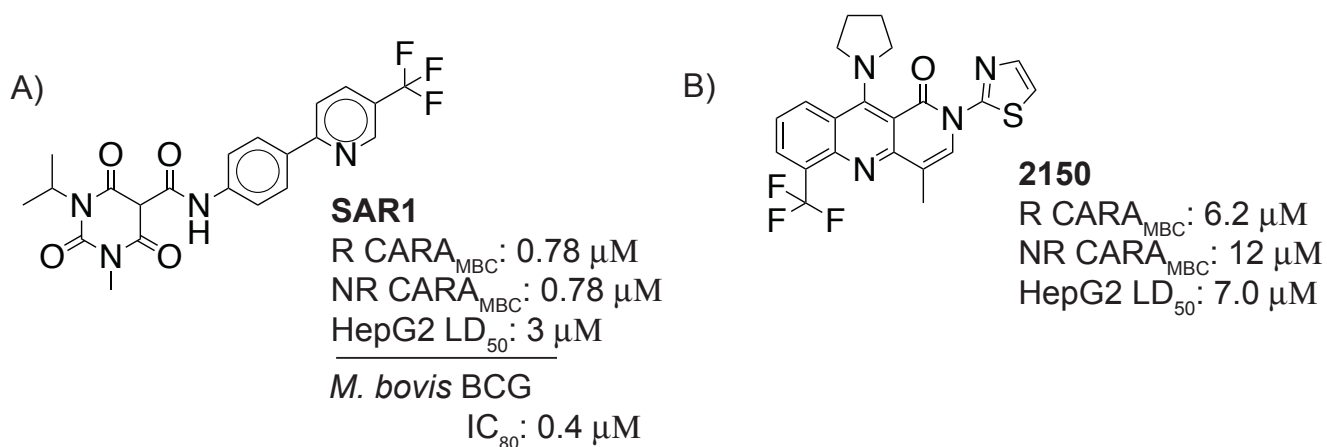

**Fig. S1. Structure, antimycobacterial activity and cytotoxicity of SAR1 and 4HQ 2150.**

(A) SAR1 and (B) 2150 were tested against Mtb under replicating (R) or non-replicating (NR) conditions in the 4-stress model and against human HepG2 cells. The activity of SAR1 against replicating *M. bovis* BCG was determined by IC<sub>80</sub>. Data are means from one of two similar experiments, each in triplicate.
