# Supplementary material for: Bactericidal Disruption of Magnesium Metallostasis in Mycobacterium tuberculosis Is Counteracted by Mutations in the Metal Ion Transporter CorA
Source: PubMed Central journal article supplement (PMC6747715; doi:10.1128/mbio.01405-19), 2019-07-09
Supplement: mBio.01405-19-sf006.pdf [file mBio.01405-19-sf006.pdf]

| Summary         |       | Infrared Spectrum Range |           | Observations                                                                                                                                                                                                                                                                                                                                                                                                                                                                                                                                                                                                                                                                                                                                                                                    |
|-----------------|-------|-------------------------|-----------|-------------------------------------------------------------------------------------------------------------------------------------------------------------------------------------------------------------------------------------------------------------------------------------------------------------------------------------------------------------------------------------------------------------------------------------------------------------------------------------------------------------------------------------------------------------------------------------------------------------------------------------------------------------------------------------------------------------------------------------------------------------------------------------------------|
| Ligand/Compound | Metal | Medium                  | Far       |                                                                                                                                                                                                                                                                                                                                                                                                                                                                                                                                                                                                                                                                                                                                                                                                 |
| 2178            | Co    | modified                | modified  | <ul style="list-style-type: none"> <li>Weak intensity uC-H bands shifted to 3137 and 3108 cm<sup>-1</sup>.</li> <li>The wide band between 2500 and 3000 cm<sup>-1</sup> (uOH and uNH) is still visible.</li> <li>Band at 1585 cm<sup>-1</sup> is more intense.</li> <li>Thiazole bands shifted towards Far IR, with apperition of new bands (224, 265, 310, 483 and 548 cm<sup>-1</sup>)</li> <li>Weak intensity uC-H bands shifted to 3137 and 3108 cm<sup>-1</sup>.</li> <li>The wide band between 2500 and 3000 cm<sup>-1</sup> (uOH and uNH) is still visible.</li> <li>No carbonyls band-shift</li> <li>Band at 1585 cm<sup>-1</sup> is more intense.</li> <li>Thiazole bands shifted towards Far IR, with apperition of new bands (224, 265, 310, 483 and 548 cm<sup>-1</sup>)</li> </ul> |
| 2178            | Mg    | unchanged               | unchanged |                                                                                                                                                                                                                                                                                                                                                                                                                                                                                                                                                                                                                                                                                                                                                                                                 |
| SAR1            | Co    | unchanged               | unchanged |                                                                                                                                                                                                                                                                                                                                                                                                                                                                                                                                                                                                                                                                                                                                                                                                 |
| SAR1            | Mg    | modified                | modified  | <ul style="list-style-type: none"> <li>Apperition of a water band (uOH) at 3389 cm<sup>-1</sup>.</li> <li>Carbonyl bands all shifted.</li> <li>Pyridine γ CH also shifted</li> <li>Apperition of bands at 325, 350, 441, 485 and 505 cm<sup>-1</sup> in the Far IR region.</li> </ul>                                                                                                                                                                                                                                                                                                                                                                                                                                                                                                           |
| SAR1            | Ni    | unchanged               | unchanged |                                                                                                                                                                                                                                                                                                                                                                                                                                                                                                                                                                                                                                                                                                                                                                                                 |
| SAR1            | Fe    | modified                | modified  | <ul style="list-style-type: none"> <li>NH elongation is still visible.</li> <li>Carbonyl band shift from 1716cm<sup>-1</sup> to 1708 cm<sup>-1</sup>.</li> <li>No shift of pyridine γ CH</li> <li>Apperition of bands at 313, 406, 490 et 530 cm<sup>-1</sup> in the Far IR region.</li> </ul>                                                                                                                                                                                                                                                                                                                                                                                                                                                                                                  |
| 2504            | Mn    | unchanged               | unchanged |                                                                                                                                                                                                                                                                                                                                                                                                                                                                                                                                                                                                                                                                                                                                                                                                 |
| 2504            | Mg    | unchanged               | unchanged |                                                                                                                                                                                                                                                                                                                                                                                                                                                                                                                                                                                                                                                                                                                                                                                                 |
| 2504            | Fe    | modified                | modified  | <ul style="list-style-type: none"> <li>Bands at 3115 and 3080 cm<sup>-1</sup> shifted to 3100 and 3080 cm<sup>-1</sup>.</li> <li>Band at 2799 cm<sup>-1</sup> disappeared</li> <li>uC-C and uC-N thiazole bands also shifted.</li> <li>Bands apperition at 234, 283, 404, 465, 486 and 558 cm<sup>-1</sup> in the Far IR region</li> </ul>                                                                                                                                                                                                                                                                                                                                                                                                                                                      |

Compared to compound alone

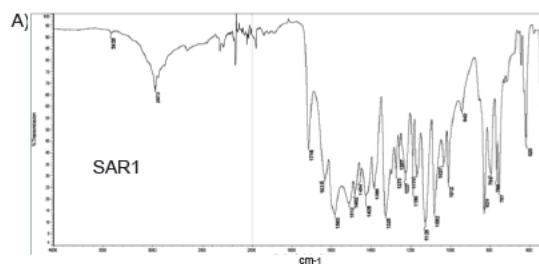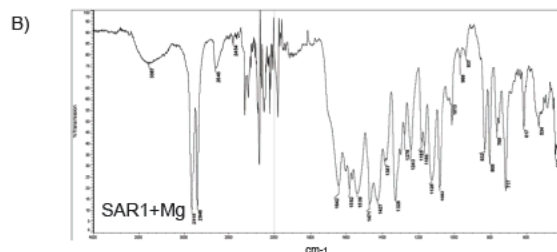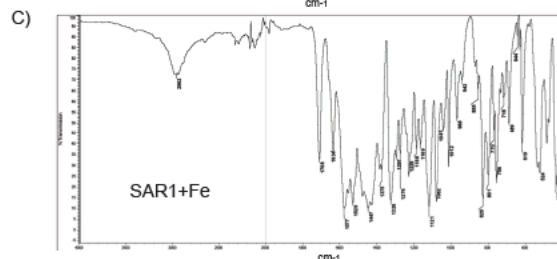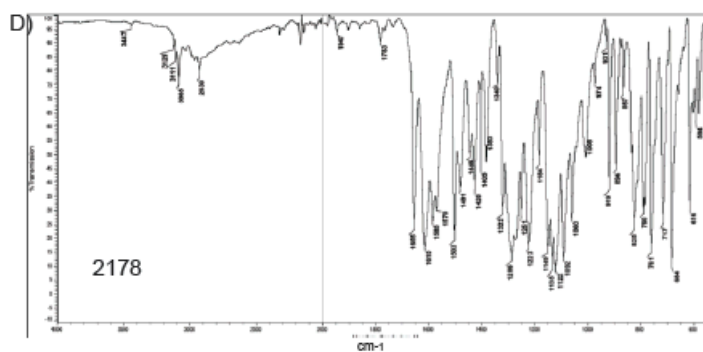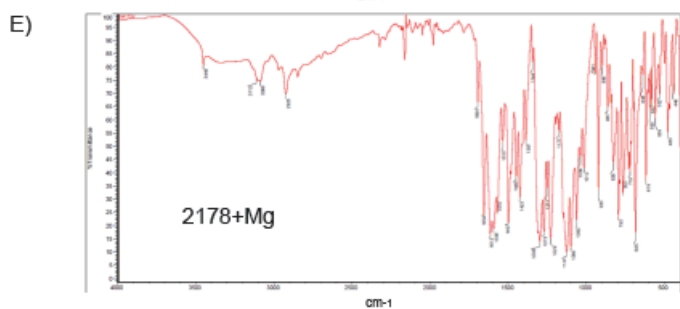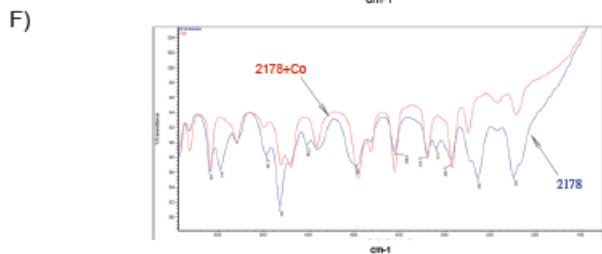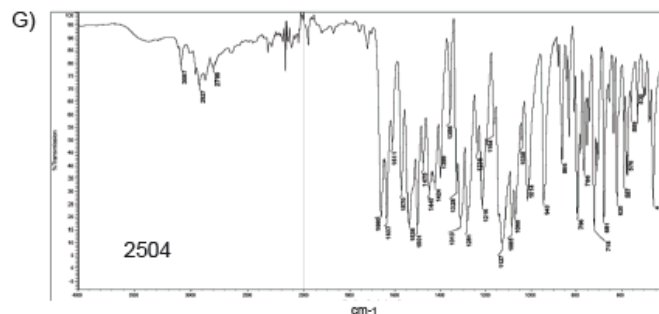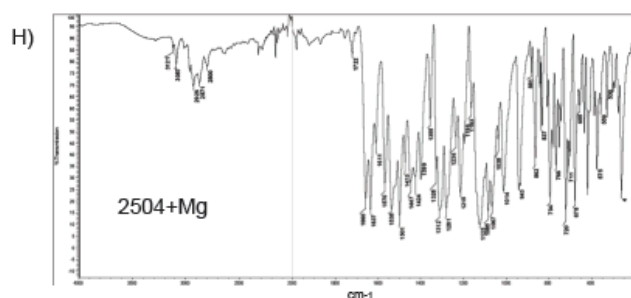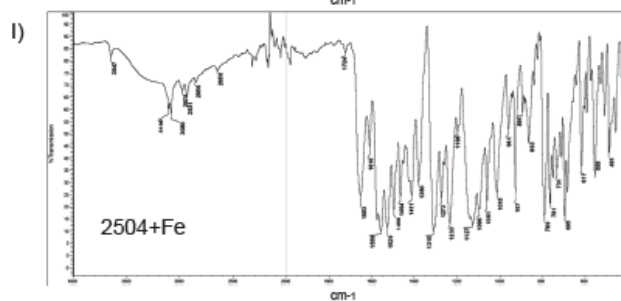

**Fig S6. Infrared spectrum analysis of solid samples of compounds potentially combined with metals.** IR spectra of (A) SAR1 alone, (B) SAR1 and magnesium, and (C) SAR1 and iron; (D) 2178 alone and (E) 2178 and magnesium; (F) far IR spectra of 2178 and cobalt (red) compared to 2178 alone (blue). IR spectra of (G) 2504 alone, (H) 2504 and magnesium, (I) 2504 and iron. Inset table summarizes relevant observations.
